# Supplementary material
Source: PubMed Central journal article supplement (PMC7484162)
Supplement: NIHMS1609126-supplement-1.pdf [file NIHMS1609126-supplement-1.pdf]

# Supplementary Figure 1:

**A.**

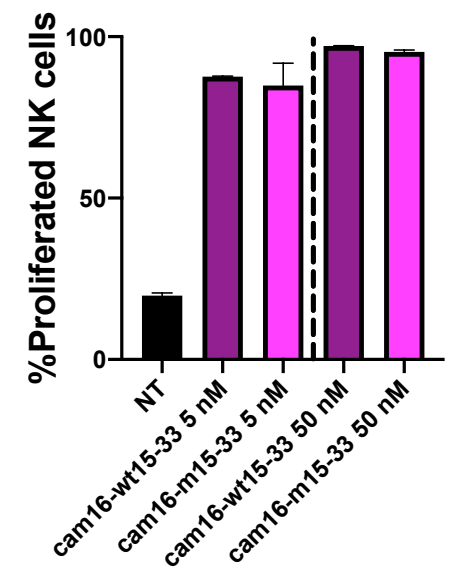

**B.**

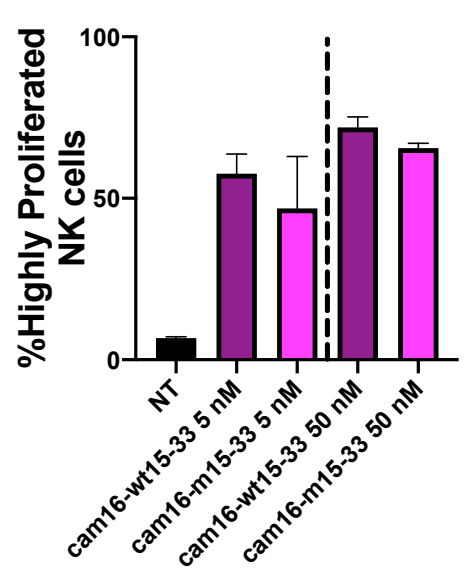

## C. Binding of cam16-wt15-33 to CD33 Fc

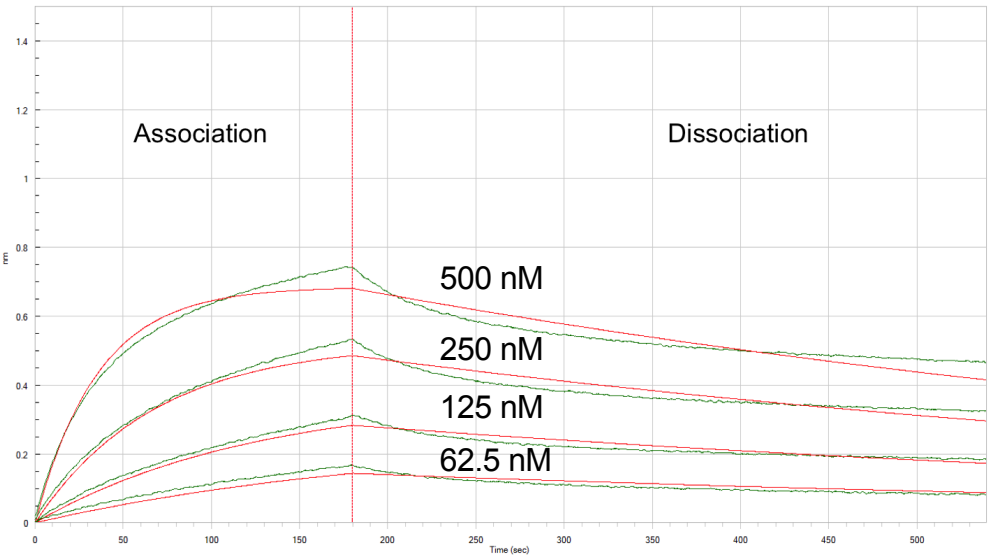

## D. Binding of scFv16-m15-33 to CD33 Fc

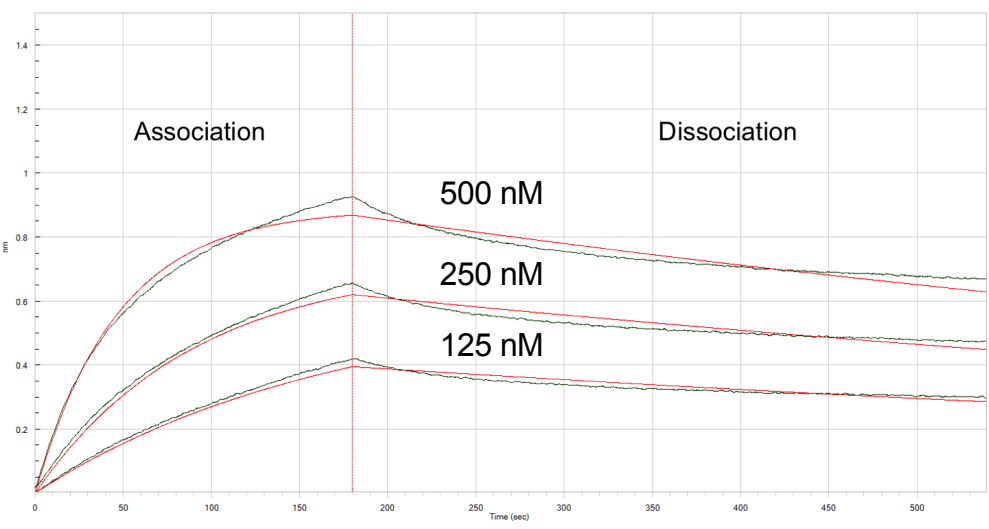

## Supplementary Figure 2:

**A.**

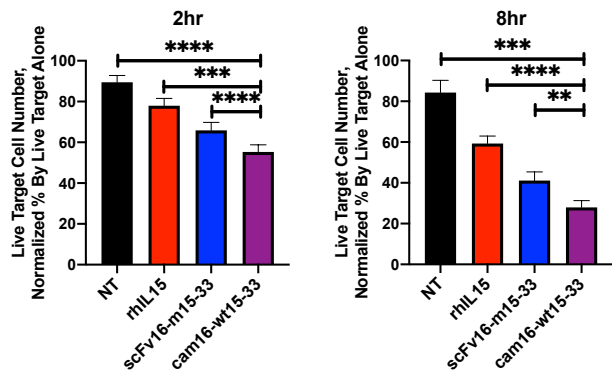

**B.**

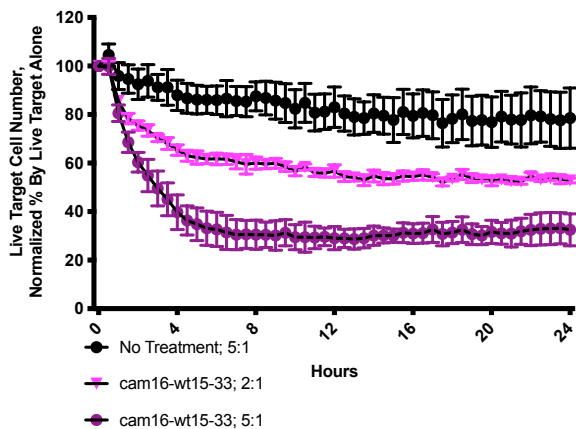

**C.**

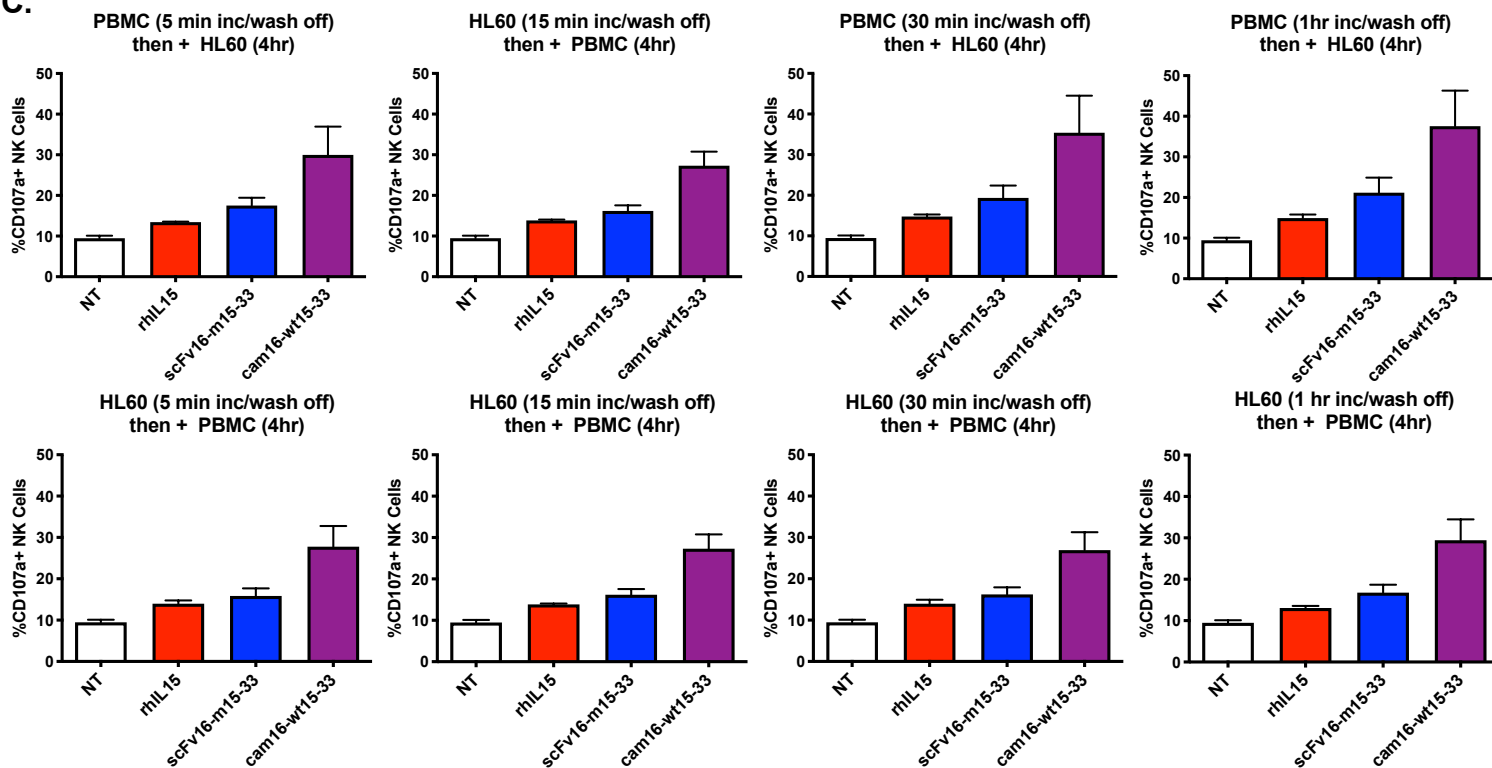

# Supplementary Figure 3:

Double Umbilical Cord  
Blood alloHCT (d28)

Matched Sibling Donor  
alloHCT (d28)

**A. No Priming**

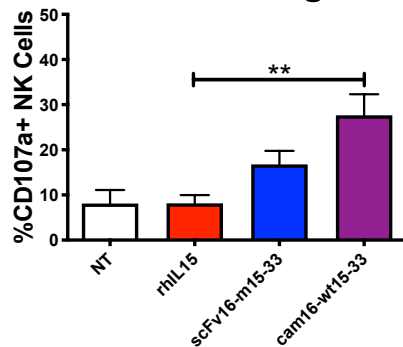

**B. Overnight Priming**

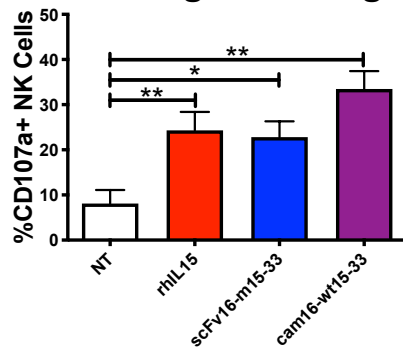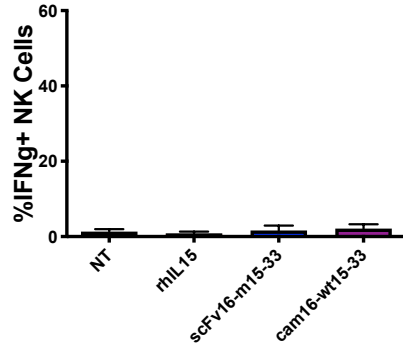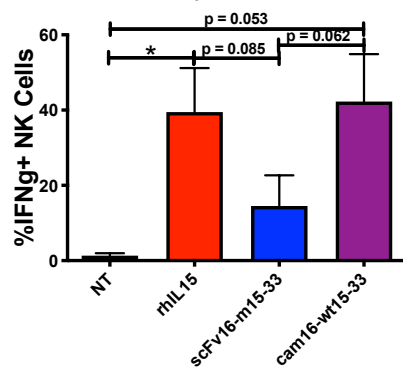

**C. No Priming**

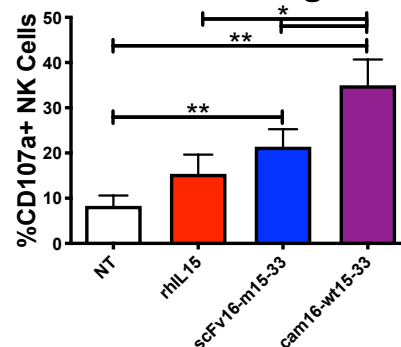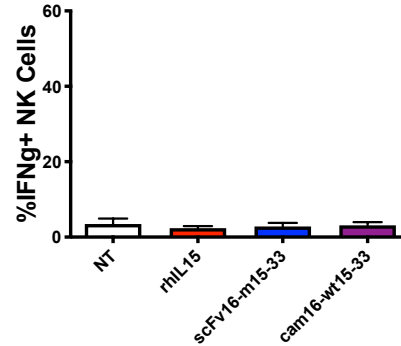

**D. Overnight Priming**

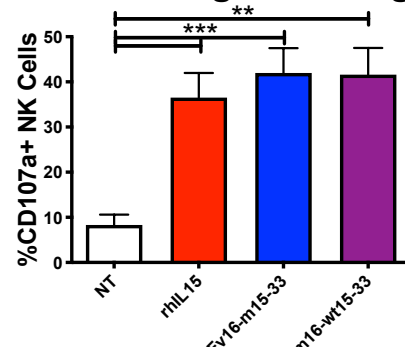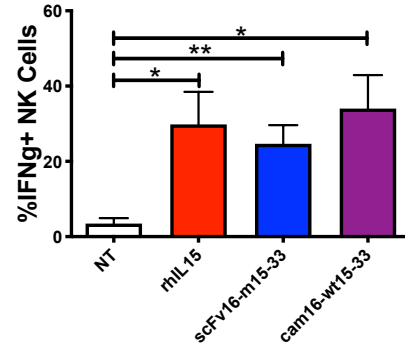

# Supplementary Figure 4:

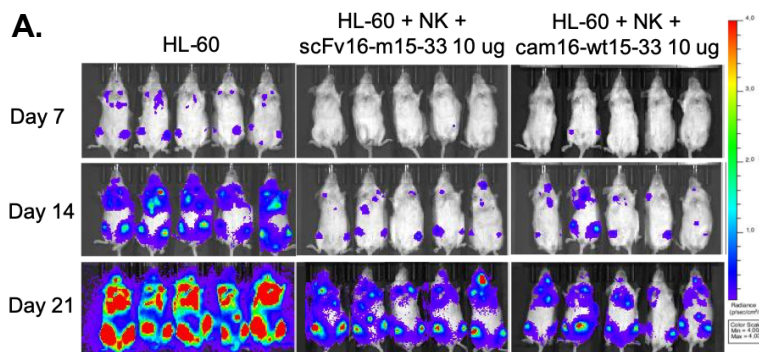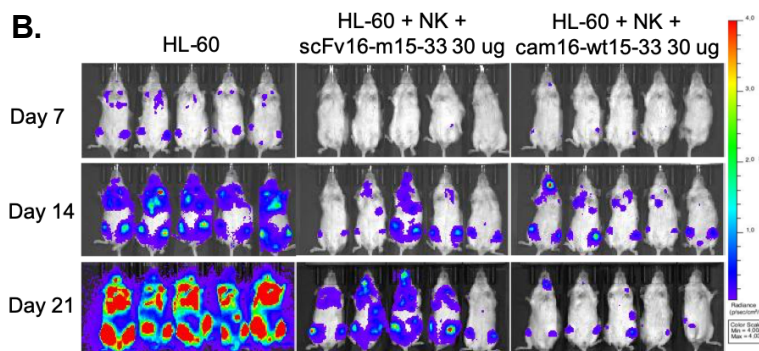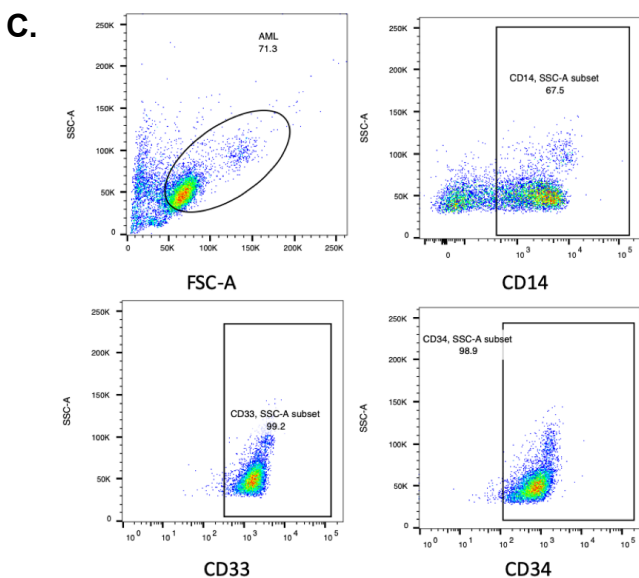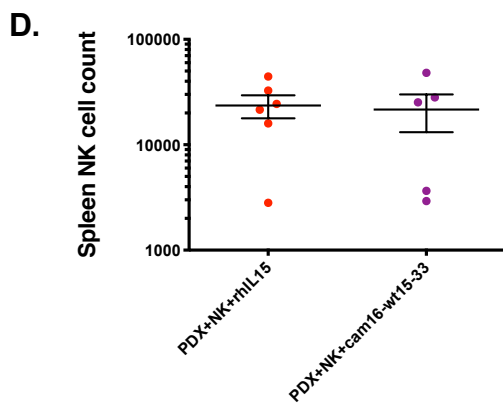

| Sample # | Graft source | Type | Conditioning | % NK (out of Lymphocytes) | %CD56bright NK | %CD56dim NK | %CD16+ NK | %NKG2A+ NK | %KIR+ NK | %CD57+ NK | ALC/ul |
|----------|--------------|------|--------------|---------------------------|----------------|-------------|-----------|------------|----------|-----------|--------|
| 1        | MSD          | PBSC | RIC          | 47.1                      | 49.4           | 50.6        | 50.1      | 96.1       | 42.3     | 21.75     | 900    |
| 2        | MSD          | BM   | MA           | 13.4                      | 39.2           | 60.8        | 31.33     | 86.4       | 24.7     | 18.54     | 1000   |
| 3        | MSD          | PBSC | RIC          | 47.8                      | 37.1           | 62.9        | 56.87     | 86.8       | 30       | 30.23     | 400    |
| 4        | MSD          | PBSC | MA           | 44.2                      | 68.8           | 31.2        | 46.8      | 89.9       | 15.5     | 17.91     | 900    |
| 5        | MSD          | BM   | MA           | 41                        | 16.1           | 83.9        | 77.55     | 89.5       | 27.2     | 43.06     | 800    |
| 6        | MSD          | BM   | RIC          | 46.3                      | 72.6           | 27.3        | 20.57     | 91.2       | 23.5     | 8.25      | 100    |
| 7        | MSD          | PBSC | RIC          | 48.4                      | 17.7           | 82.3        | 73.19     | 88.2       | 30.1     | 51.31     | 1100   |
| 8        | MSD          | BM   | MA           | 18.9                      | 47.8           | 52.2        | 45.02     | 79         | 31.9     | 26.05     | 600    |
| 9        | MSD          | PBSC | RIC          | 31                        | 55.6           | 44.4        | 48.7      | 83.6       | 23.7     | 26.46     | 900    |
| 10       | dUCBT        | UCB  | RIC          | 65.1                      | 37.2           | 62.8        | 53.62     | 93.5       | 39.6     | 9.44      | 500    |
| 11       | dUCBT        | UCB  | RIC          | 55.8                      | 13.9           | 85.7        | 66.41     | 85.8       | 66.6     | 30.39     | 900    |
| 12       | dUCBT        | UCB  | MA           | 68.5                      | 20.9           | 79.1        | 59.69     | 90.3       | 56.6     | 52.56     | 400    |
| 13       | dUCBT        | UCB  | MA           | 78.7                      | 47.8           | 52.2        | 51.6      | 96.9       | 22.1     | 14.72     | 300    |
| 14       | dUCBT        | UCB  | RIC          | 60.4                      | 32.9           | 67.1        | 64.43     | 92.5       | 41.8     | 28.34     | 600    |
| 15       | dUCBT        | UCB  | MA           | 61.7                      | 4.46           | 95.5        | 74.27     | 80.4       | 36.8     | 60.58     | 200    |
| 16       | dUCBT        | UCB  | RIC          | 3.63                      | 51.5           | 48.5        | 36.6      | 68.8       | 4.63     | 18.76     | 100    |
| 17       | dUCBT        | UCB  | RIC          | 22.1                      | 6.86           | 93.1        | 77.71     | 94.8       | 70.7     | 32.36     | 600    |
| 18       | dUCBT        | UCB  | MA           | 40.4                      | 48.7           | 51.3        | 50.2      | 89         | 33.9     | 31.28     | 100    |

Supplementary Table I: Patient Characteristics
